# Supplementary material for: Proline Dehydrogenase (PRODH) Is Expressed in Lung Adenocarcinoma and Modulates Cell Survival and 3D Growth by Inducing Cellular Senescence
Source: MDPI journal article supplement (doi:10.3390/ijms25020714), 2024-01-05
Supplement: s1 [file s1]

A

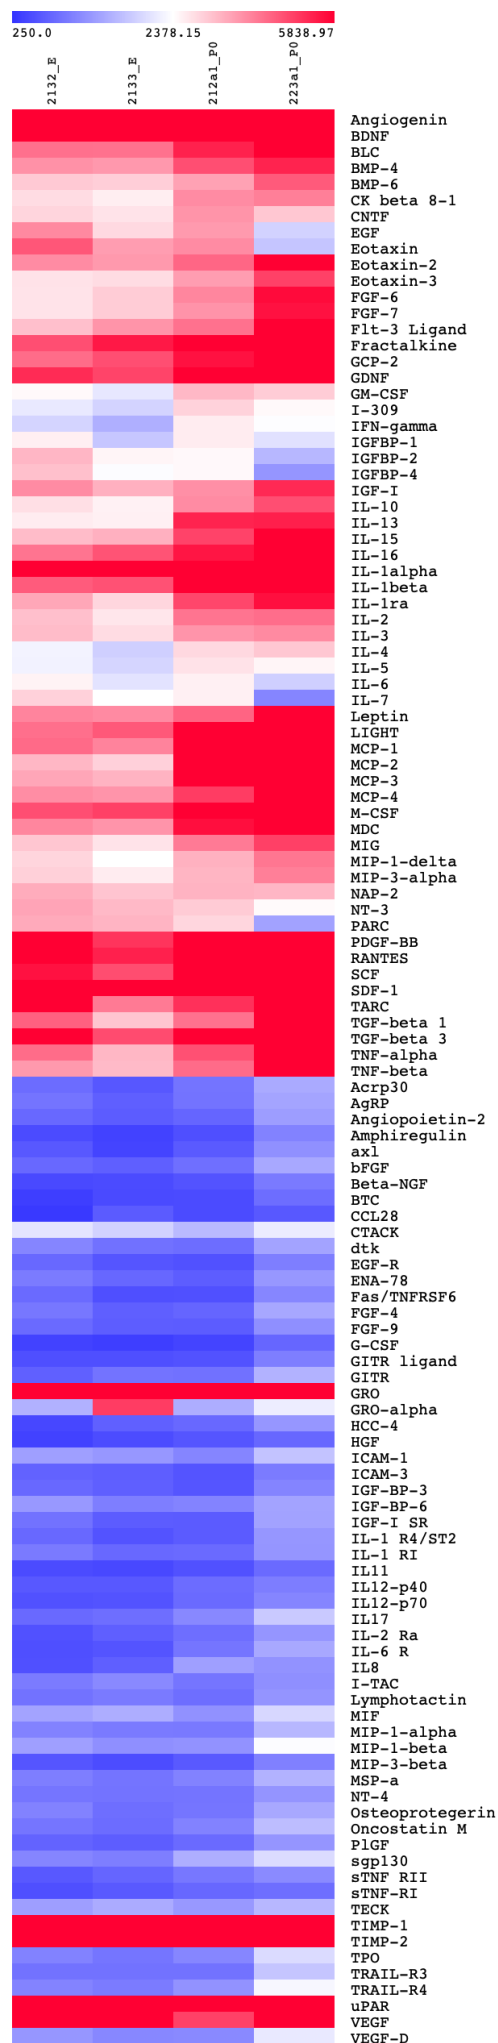

B

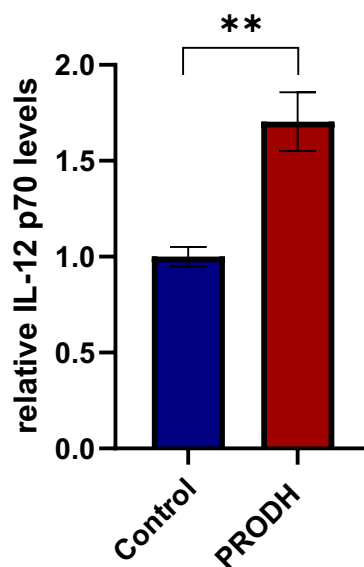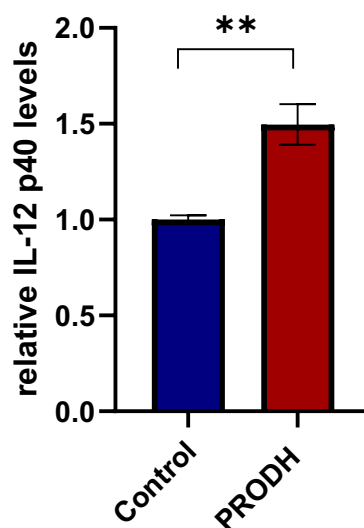

**Figure S4. Secretome analysis by antibody array. (A)** Heatmap showing the levels of expression of the indicated cytokines as obtained by secretome analysis. From left to right: control clone 1, control clone 2, PRODH clone 1, and PRODH clone 4. **(B)** secreted protein levels of the anti-tumor cytokine IL-12 (upper panel IL-12p70, lower panel IL-12p40) in control and PRODH-expressing clones of the NCI-H1299 cell line, as detected by secretome analysis. The graphs show the average  $\pm$  SEM of secretome results obtained from two PRODH-expressing clones and two control clones. Asterisks indicate significant differences in the two types of clones (Student t-test; \*\* indicates  $p$ -value  $< 0,01$ ).
