# Supplementary material for: Proline Dehydrogenase (PRODH) Is Expressed in Lung Adenocarcinoma and Modulates Cell Survival and 3D Growth by Inducing Cellular Senescence
Source: MDPI journal article supplement (doi:10.3390/ijms25020714), 2024-01-05
Supplement: s1 [file s1]

**Figure S5.**

## **Scheme of antibodies spotted on the two membranes of the antibody array used for secretome analysis**

### **Membrane C6 scheme**

|           |           |       |       |              |             |            |           |          |             |             |         |         |         |
|-----------|-----------|-------|-------|--------------|-------------|------------|-----------|----------|-------------|-------------|---------|---------|---------|
| POS       | POS       | NEG   | NEG   | Blank        | Angiogenin  | BDNF       | BLC       | BMP-4    | BMP-6       | CK beta 8-1 | CNTF    | EGF     | Eotaxin |
| POS       | POS       | NEG   | NEG   | Blank        | Angiogenin  | BDNF       | BLC       | BMP-4    | BMP-6       | CK beta 8-1 | CNTF    | EGF     | Eotaxin |
| Eotaxin-2 | Eotaxin-3 | FGF-6 | FGF-7 | Flt-3 Ligand | Fractalkine | GCP-2      | GDNF      | GM-CSF   | I-309       | IFN-gamma   | IGFBP-1 | IGFBP-2 | IGFBP-4 |
| Eotaxin-2 | Eotaxin-3 | FGF-6 | FGF-7 | Flt-3 Ligand | Fractalkine | GCP-2      | GDNF      | GM-CSF   | I-309       | IFN-gamma   | IGFBP-1 | IGFBP-2 | IGFBP-4 |
| IGF-I     | IL-10     | IL-13 | IL-15 | IL-16        | IL-1alpha   | IL-1beta   | IL-1ra    | IL-2     | IL-3        | IL-4        | IL-5    | IL-6    | IL-7    |
| IGF-I     | IL-10     | IL-13 | IL-15 | IL-16        | IL-1alpha   | IL-1beta   | IL-1ra    | IL-2     | IL-3        | IL-4        | IL-5    | IL-6    | IL-7    |
| Leptin    | LIGHT     | MCP-1 | MCP-2 | MCP-3        | MCP-4       | M-CSF      | MDC       | MIG      | MIP-1-delta | MIP-3-alpha | NAP-2   | NT-3    | PARC    |
| Leptin    | LIGHT     | MCP-1 | MCP-2 | MCP-3        | MCP-4       | M-CSF      | MDC       | MIG      | MIP-1-delta | MIP-3-alpha | NAP-2   | NT-3    | PARC    |
| PDGF-BB   | RANTES    | SCF   | SDF-1 | TARC         | TGF-beta 1  | TGF-beta 3 | TNF-alpha | TNF-beta | Blank       | Blank       | Blank   | Blank   | POS     |
| PDGF-BB   | RANTES    | SCF   | SDF-1 | TARC         | TGF-beta 1  | TGF-beta 3 | TNF-alpha | TNF-beta | Blank       | Blank       | Blank   | Blank   | POS     |

### **Membrane C7 scheme**

|        |              |          |             |             |             |         |              |              |              |       |           |          |         |
|--------|--------------|----------|-------------|-------------|-------------|---------|--------------|--------------|--------------|-------|-----------|----------|---------|
| POS    | POS          | NEG      | NEG         | Blank       | Acip30      | AgRP    | Angiopoietin | Amphiregulin | axl          | bFGF  | Beta-NGF  | BTC      | CCL28   |
| POS    | POS          | NEG      | NEG         | Blank       | Acip30      | AgRP    | Angiopoietin | Amphiregulin | axl          | bFGF  | Beta-NGF  | BTC      | CCL28   |
| CTACK  | dtk          | EGF-R    | ENA-78      | Fas/TNFRSF6 | FGF-4       | FGF-9   | G-CSF        | GITR ligand  | GITR         | GRO   | GRO-alpha | HCC-4    | HGF     |
| CTACK  | dtk          | EGF-R    | ENA-78      | Fas/TNFRSF6 | FGF-4       | FGF-9   | G-CSF        | GITR ligand  | GITR         | GRO   | GRO-alpha | HCC-4    | HGF     |
| ICAM-1 | ICAM-3       | IGF-BP-3 | IGF-BP-6    | IGF-I SR    | IL-1 R4/ST2 | IL-1 RI | IL11         | IL12-p40     | IL12-p70     | IL17  | IL-2 Ra   | IL-6 R   | IL8     |
| ICAM-1 | ICAM-3       | IGF-BP-3 | IGF-BP-6    | IGF-I SR    | IL-1 R4/ST2 | IL-1 RI | IL11         | IL12-p40     | IL12-p70     | IL17  | IL-2 Ra   | IL-6 R   | IL8     |
| I-TAC  | Lymphotoctin | MIF      | MIP-1-alpha | MIP-1-beta  | MIP-3-beta  | MSP-a   | NT-4         | Osteoprotege | Oncostatin M | PIGF  | sgp130    | sTNF RII | sTNF-RI |
| I-TAC  | Lymphotoctin | MIF      | MIP-1-alpha | MIP-1-beta  | MIP-3-beta  | MSP-a   | NT-4         | Osteoprotege | Oncostatin M | PIGF  | sgp130    | sTNF RII | sTNF-RI |
| TECK   | TIMP-1       | TIMP-2   | TPO         | TRAIL-R3    | TRAIL-R4    | uPAR    | VEGF         | VEGF-D       | Blank        | Blank | Blank     | Blank    | POS     |
| TECK   | TIMP-1       | TIMP-2   | TPO         | TRAIL-R3    | TRAIL-R4    | uPAR    | VEGF         | VEGF-D       | Blank        | Blank | Blank     | Blank    | POS     |

**Figure S6. Membrane pictures used for raw analysis of the secretome**

H1299\_control 1  
(2132\_empty)

C6

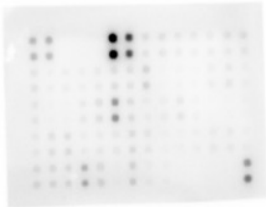

H1299\_control 2  
(2133\_empty)

C6

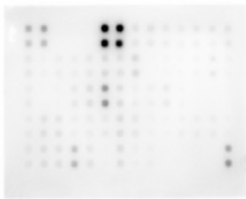

C7

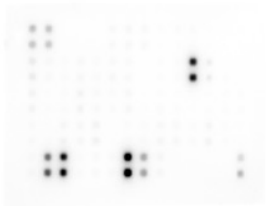

C7

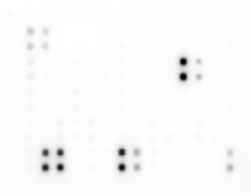

H1299\_PRODHD 1  
(212a1 PO)

C6

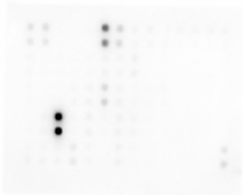

H1299\_PRODHD 4  
(223a1 PO)

C6

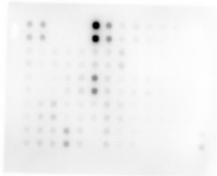

C7

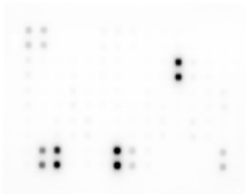

C7

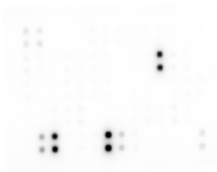

**Figure S7. Pictures for data acquisition during secretome analysis**

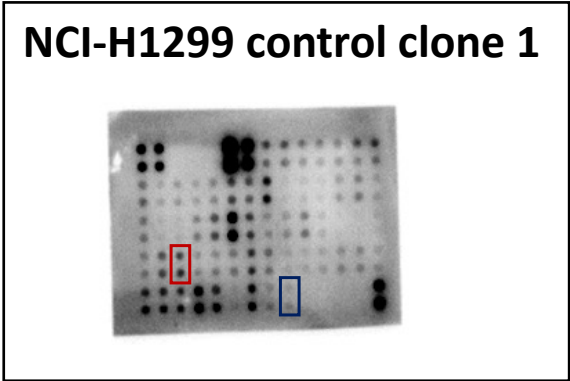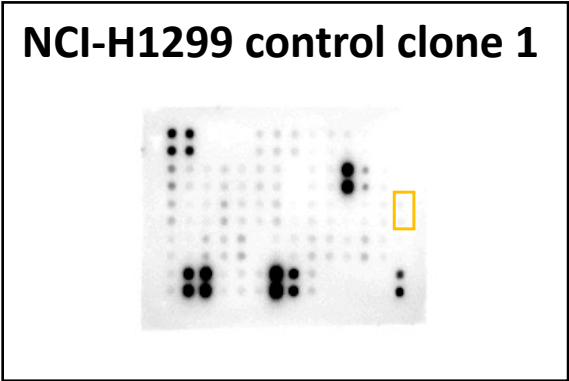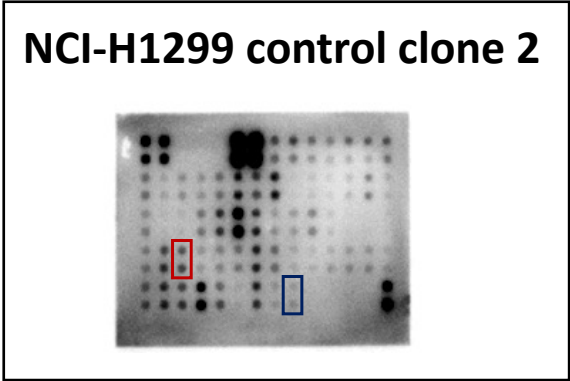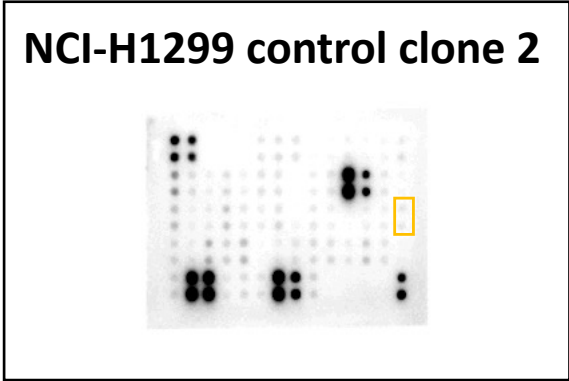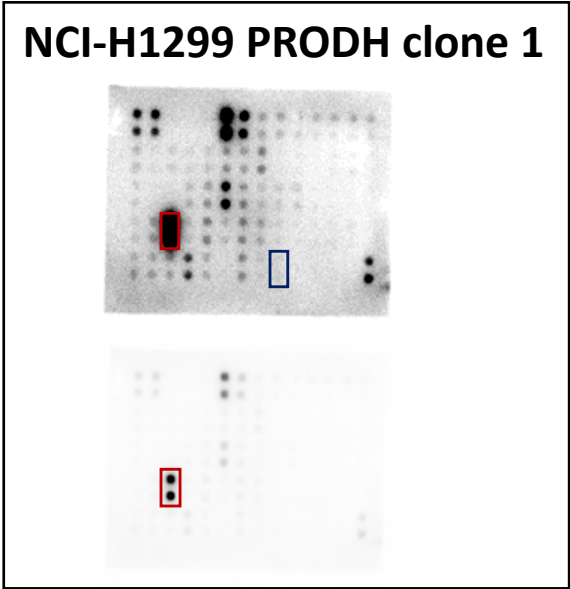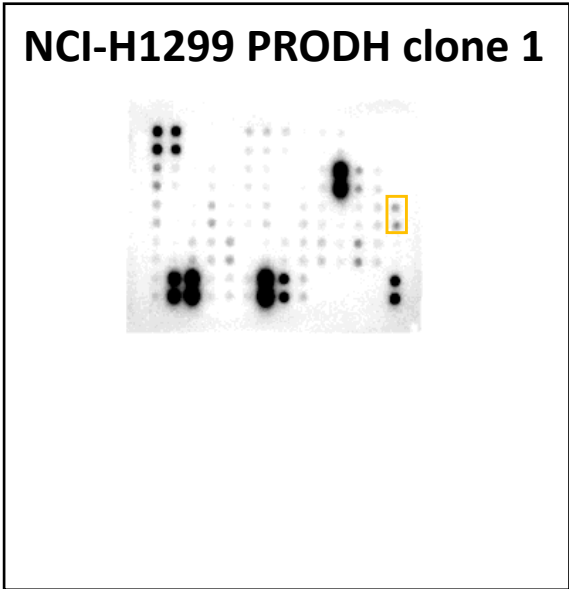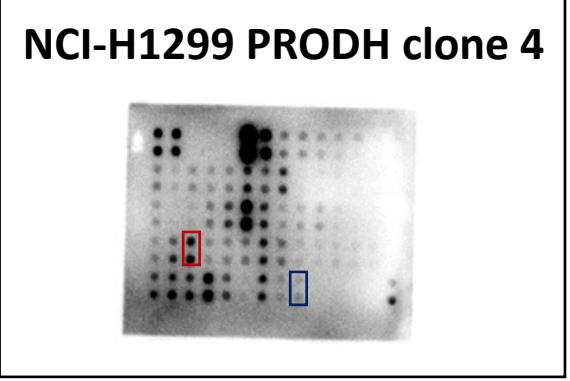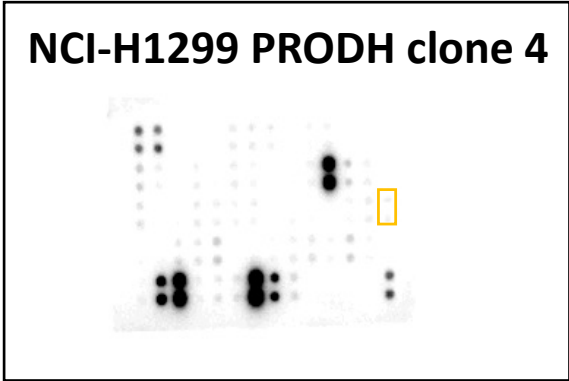

**C6 membrane**

**C7 membrane**
