# Supplementary material for: Proline Dehydrogenase (PRODH) Is Expressed in Lung Adenocarcinoma and Modulates Cell Survival and 3D Growth by Inducing Cellular Senescence
Source: MDPI journal article supplement (doi:10.3390/ijms25020714), 2024-01-05
Supplement: s1 [file s1]

Figure S1.

Raw data of the immunoblots presented in Figure 2, left panel

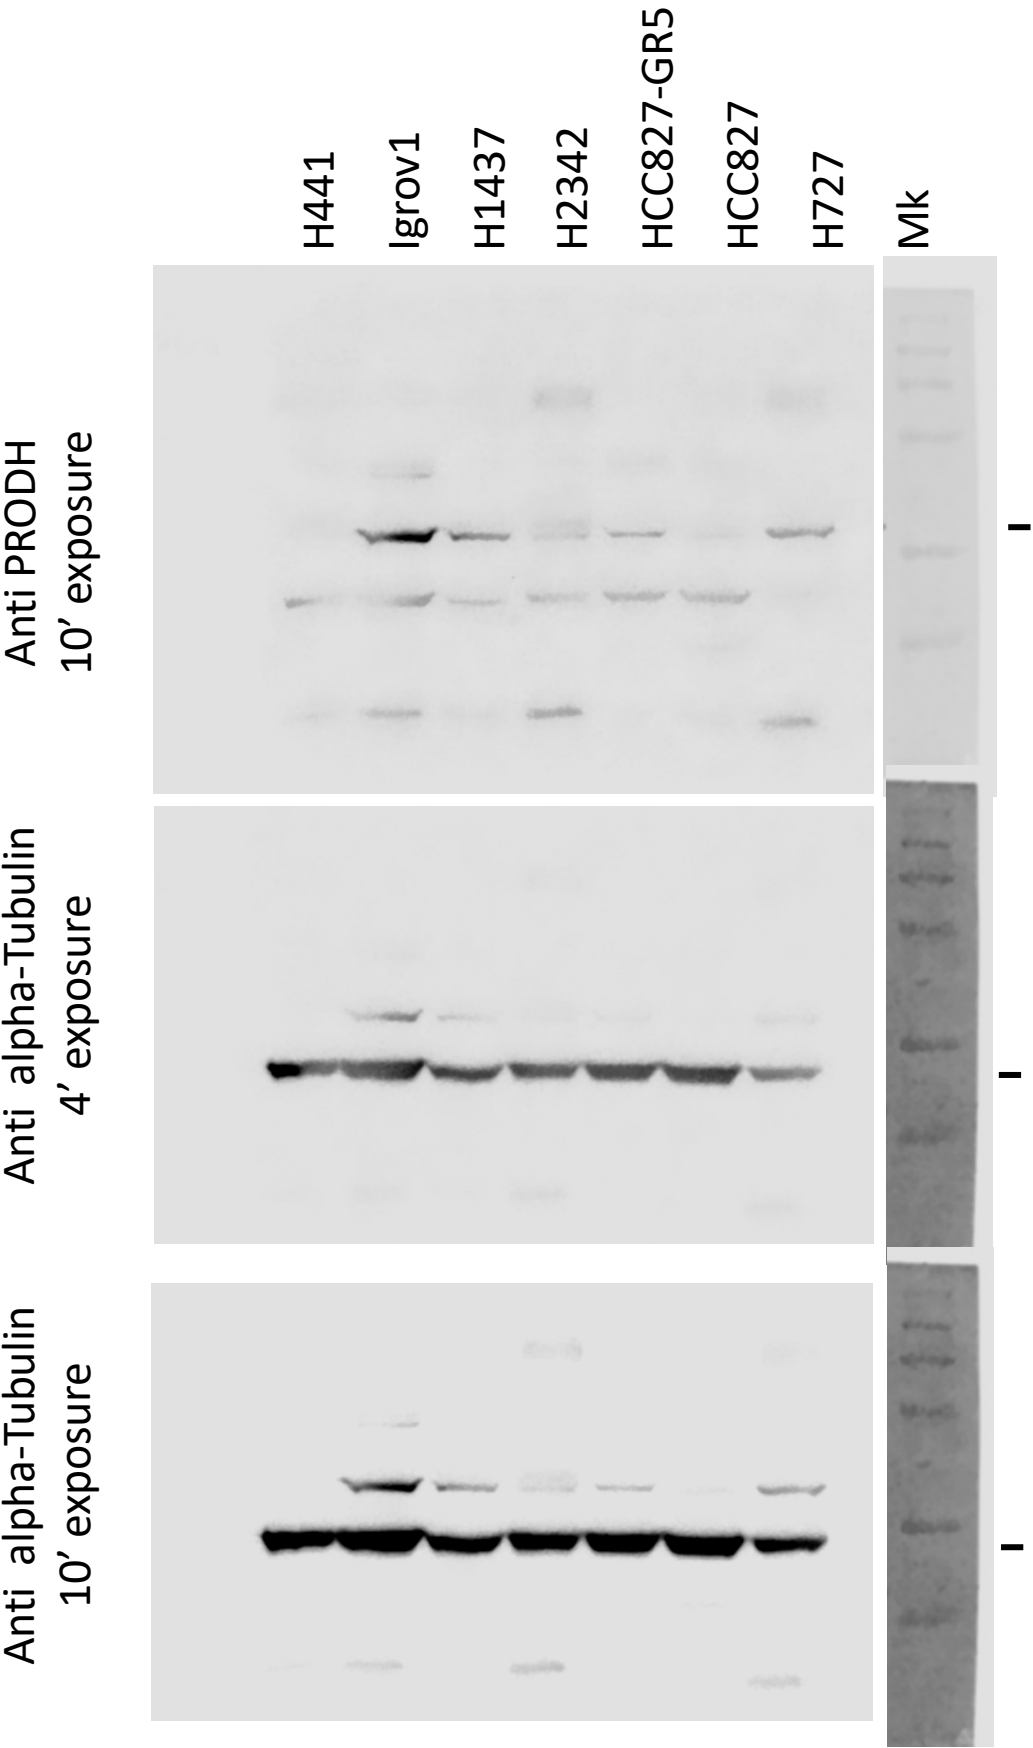

Figure S2.

Raw data of the immunoblots presented in Figure 2, right panel

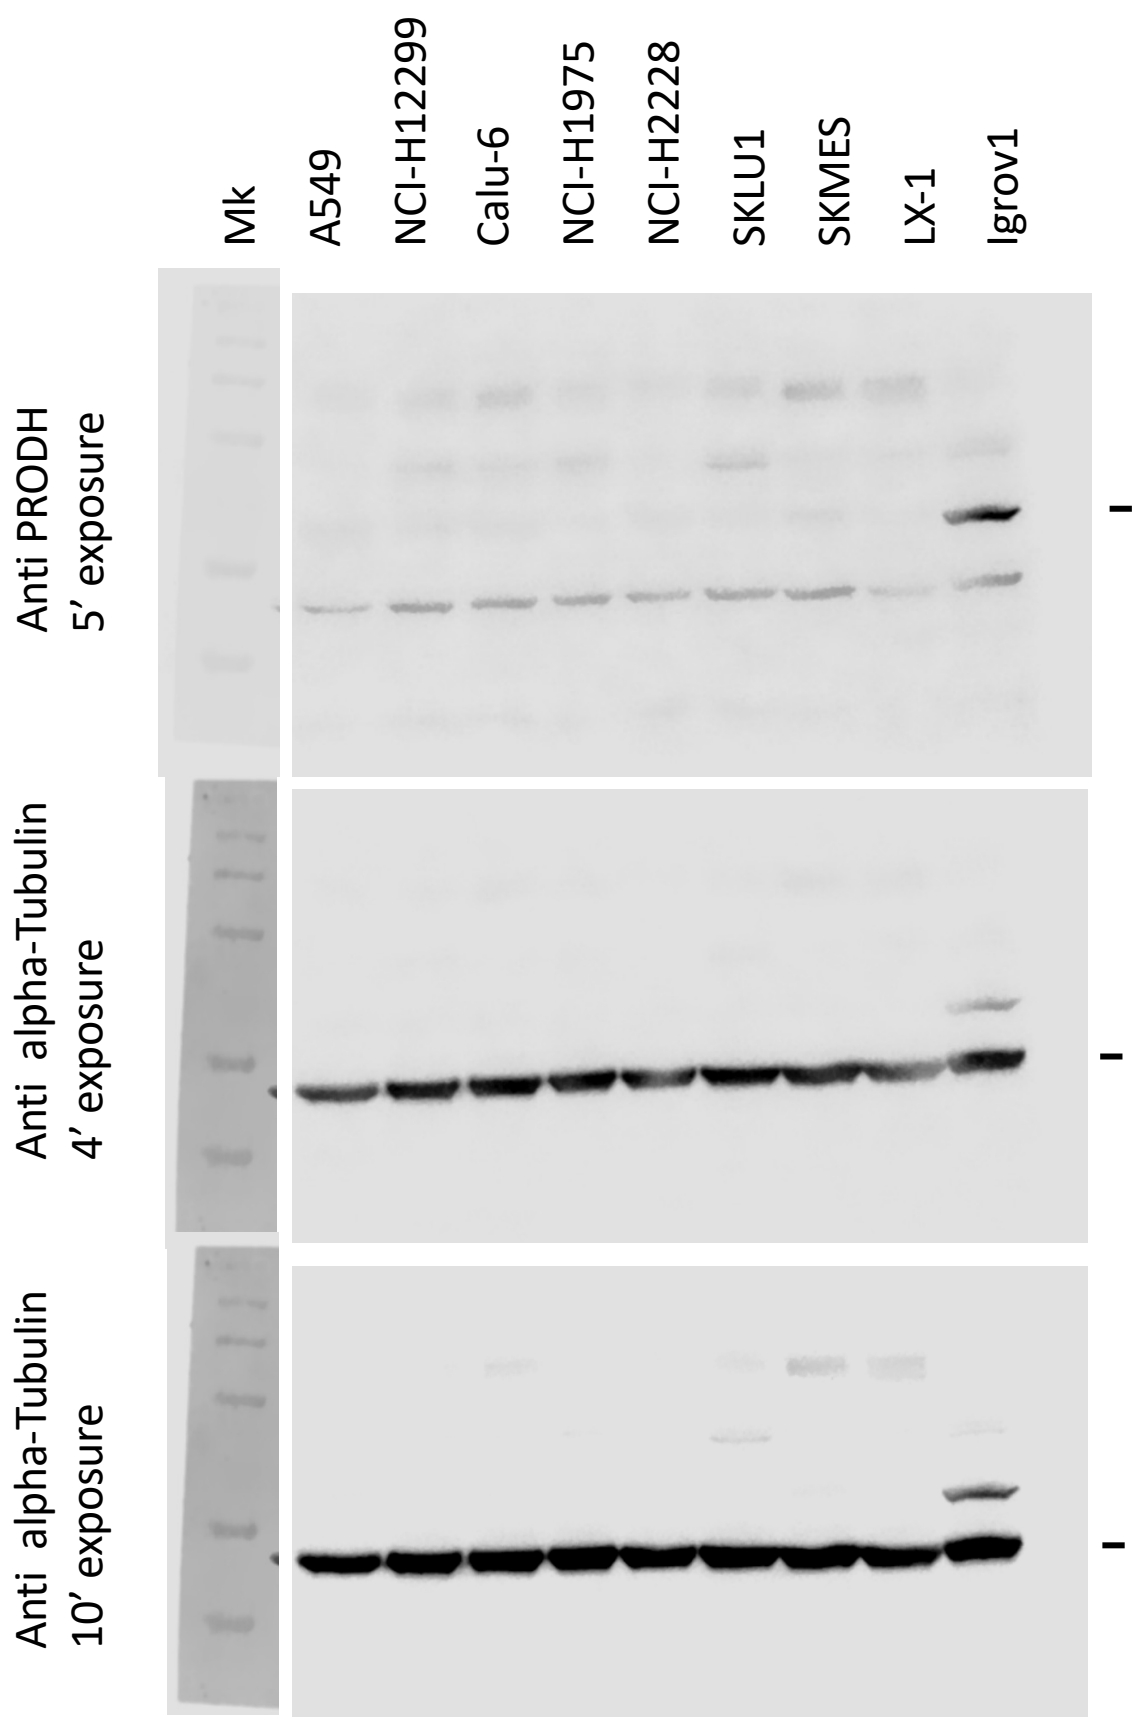

**Figure S3.**  
**Raw data of the immunoblots presented in Figure 5**

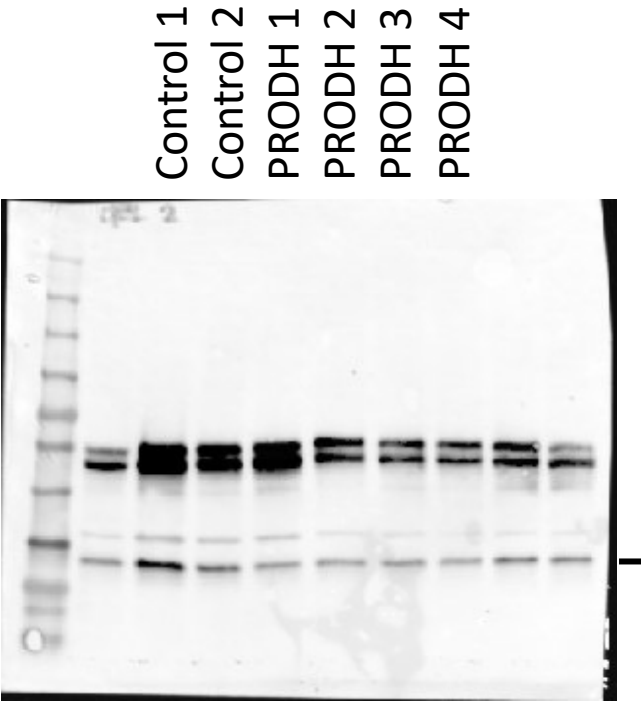

Anti caspase-3

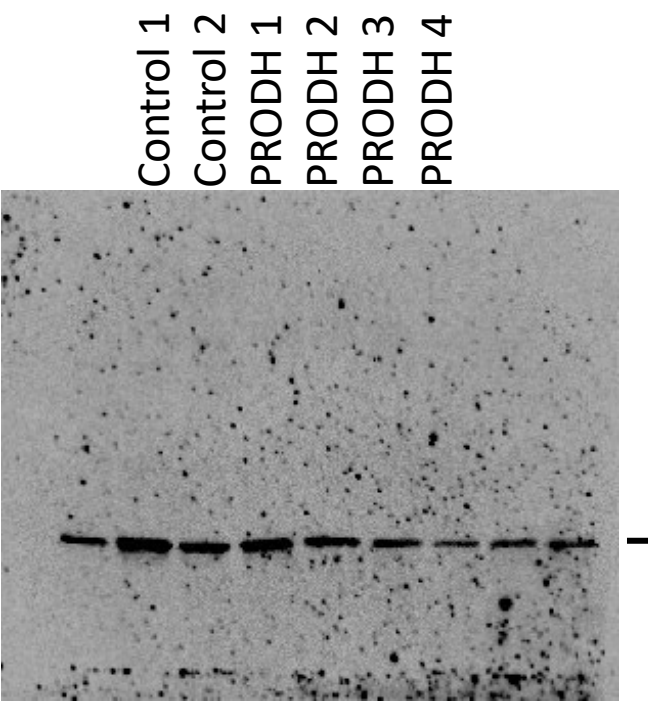

Anti GAPDH
